# Supplementary material for: Mixed-methods randomised study exploring the feasibility and acceptability of eye-movement desensitisation and reprocessing for improving the mental health of traumatised survivors of intensive care following hospital discharge: protocol
Source: HighWire-hosted journal article supplement (doi:10.1136/bmjopen-2023-081969), 2024-01-01
Supplement: bmjopen-2023-081969supp003_data_supplement.pdf [file bmjopen-2023-081969supp003_data_supplement.pdf]

## Supplemental file 3. Secondary clinical outcome measures – description and timing

| Measure                                                        | Description                                                                                                                                                                                                                                                                                                                                                                                                                                                                                                                                                                                                                                                                                                                                                                                                                                                                     | Timepoint |                                                       |                                                       |
|----------------------------------------------------------------|---------------------------------------------------------------------------------------------------------------------------------------------------------------------------------------------------------------------------------------------------------------------------------------------------------------------------------------------------------------------------------------------------------------------------------------------------------------------------------------------------------------------------------------------------------------------------------------------------------------------------------------------------------------------------------------------------------------------------------------------------------------------------------------------------------------------------------------------------------------------------------|-----------|-------------------------------------------------------|-------------------------------------------------------|
|                                                                |                                                                                                                                                                                                                                                                                                                                                                                                                                                                                                                                                                                                                                                                                                                                                                                                                                                                                 | Baseline  | Two-months post-hospital discharge                    | 12-months post-hospital discharge                     |
| <b>Impact of Events Scale-Revised (IES-R) (1)</b>              | IES-R is a 22-question patient reported outcome measure (PROM) widely used to assess symptoms of PTSD in critical care research(2,3), recommended by critical care core outcome dataset developers(4-6) and the International Conference of Harmonisation of Outcome Measures(7). The 22 questions cover symptoms of intrusion, avoidance, and hyperarousal. Participants indicate how distressing the symptoms have been over the last 7 days. Symptom severity can be 0 (not at all), 1 (a little bit), 2 (moderately), 3 (quite a bit), 4 (extremely), giving a total scoring range of 0 to 88.<br>A range of cut-offs for diagnosing PTSD have been identified in different populations. To maximise sensitivity, and minimise risk of leaving PTSD untreated, we will apply the lower cut-off of 22 and retrospectively conduct a sensitivity analysis against the CAPS-5. | X         | X                                                     | X                                                     |
| <b>Clinician Administered PTSD Scale for DSM-5 (CAPS-5)(8)</b> | CAPS-5 is a structured diagnostic interview, considered the gold-standard assessment of PTSD symptoms. In addition to evaluating the 20 symptoms listed in the DSM-5, the questions focus on the onset and duration of these symptoms, the subjective distress experienced, how these symptoms impact an individual's social and occupational functioning, any improvement in symptoms since a prior CAPS assessment, the overall validity of the responses, the severity of PTSD as a whole, and the criteria for the dissociative subtype, which encompasses depersonalization and derealization.<br>CAPS-5 assessment will be conducted face-to-face or over the phone, (according to participant preference) methods which deliver comparable results.                                                                                                                      |           | X<br>(participants who have consented to part B only) | X (participants who have consented to part B only)    |
| <b>Clinical Global Impression-Severity scale (CGI-S)(9)</b>    | The CGI-S can be used to assess symptom severity and response to treatment. It requires a clinician to rate the severity of a patient's mental illness, on a seven-point scale ranging from; 1 – normal, not at all ill, 2 – borderline mentally ill, 3 – mildly ill, 4 – moderately ill, 5 – markedly ill, 6 – severely ill, 7 – among the most extremely ill patients.                                                                                                                                                                                                                                                                                                                                                                                                                                                                                                        |           | X<br>(participants who have consented to part B only) | X<br>(participants who have consented to part B only) |

|                                                                                    |                                                                                                                                                                                                                                                                                                                                                                                                                                                |   |                                                       |                                                       |
|------------------------------------------------------------------------------------|------------------------------------------------------------------------------------------------------------------------------------------------------------------------------------------------------------------------------------------------------------------------------------------------------------------------------------------------------------------------------------------------------------------------------------------------|---|-------------------------------------------------------|-------------------------------------------------------|
| <b>Clinical Global Impression-Improvement scale (CGI-I)(9)</b>                     | The CGI-I requires a clinician to assess degree of improvement since baseline, in a participant's symptoms, on a seven-point ranging from; 1-very much improved; 2-much improved; 3-minimally improved; 4-no change; 5-minimally worse; 6-much worse; 7-very much worse.                                                                                                                                                                       |   | X<br>(participants who have consented to part B only) | X<br>(participants who have consented to part B only) |
| <b>Patient Health Questionnaire (PHQ-9)(10)</b>                                    | Self-administred, vaildated tool assesses depressive symptom severity(10-12). Scores are calculated by assigning 0 for 'not at all, 1- 'several days', 2 - 'more than half the days' or 3 - 'nearly every day' for responses to nine questions, giving a score in the range 0-27. PHQ-9 score of 0-4 demonstrates no - minimal depression severity. 5-9 = mild severity, 10-14 = moderate severity, 15-19 = moderately severe, 20-27 = severe. | X | X                                                     | X                                                     |
| <b>Generalised Anxiety Disorder-7 (GAD-7)(13)</b>                                  | Seven-question, self-administered tool is validated to assess for anxiety symptom severity. Scores are calculated by assigning 0 for 'not at all, 1- 'several days', 2 - 'more than half the days' or 3 - 'nearly every day' for responses to nine questions, giving a score in the range 0-21. GAD-7 scores of 5, 10 and 15 represent cut-offs for mild, moderate and severe anxiety respectively.                                            | X | X                                                     | X                                                     |
| <b>Health Related Quality of Life: Euroqual 5-level 5-Dimension (EQ-5D-5L)(14)</b> | Comprises five quality-of-life dimensions; mobility, self-care, usual activities, pain/discomfort and anxiety/depression. Participants report levels ranging from 'no problems' to 'extreme problems'.                                                                                                                                                                                                                                         | X | X                                                     | X                                                     |
